# Supplementary material for: Improvement of thermal stability and luminescence in Ca6Ce2Na2(PO4)6F2:Mn2+/Tb3+via the substitution of Ca with Sr/Ba for structural modification
Source: Royal Society of Chemistry journal article supplement (doi:10.1039/d0nj05178k), 2021-01-01
Supplement: d0nj05178k1.pdf [file d0nj05178k1.pdf]

Supporting information

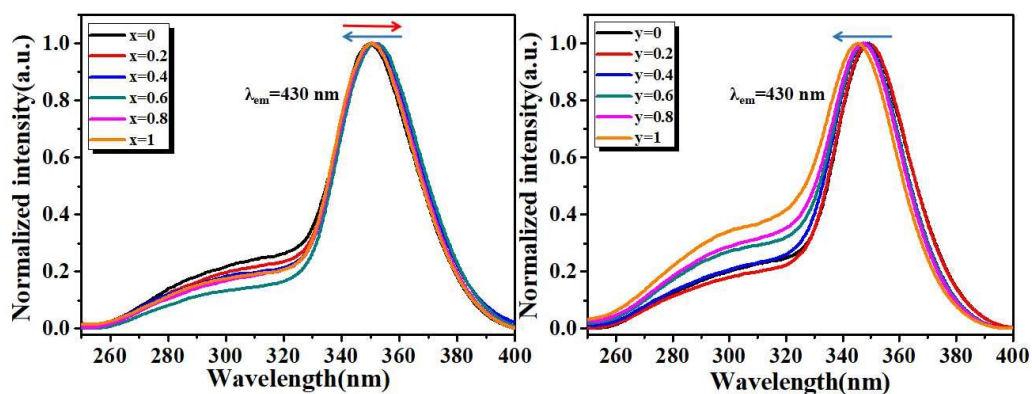

S1 Excitation spectra of C<sub>6-x</sub>S<sub>x</sub>CNPF and C<sub>6-y</sub>B<sub>y</sub>CNPF monitored at 430 nm
